# Supplementary material for: Green synthesis of anisotropic silver nanoparticles with potent anticancer activity using Taxus baccata extract
Source: Royal Society of Chemistry journal article supplement (doi:10.1039/c4ra08758e), 2014-01-01
Supplement: c4ra08758e1.pdf [file c4ra08758e1.pdf]

## Electronic Supplementary Information

# **Green synthesis of anisotropic silver nanoparticles with potent anticancer activity using *Taxus baccata* extract**

Abolghasem Abbasi Kajani,<sup>a</sup> Abdol-Khalegh Bordbar,<sup>\*b</sup> Sayyed Hamid Zarkesh Esfahani,<sup>c</sup> Ahmad Reza Khosropour<sup>b</sup> and Amir Razmjou<sup>a</sup>

<sup>a</sup> Department of Biotechnology, Faculty of Advanced Sciences and Technologies, University of Isfahan, Isfahan, Iran

<sup>b</sup> Department of Chemistry, University of Isfahan, Isfahan, 81746-73441, Iran

<sup>c</sup> Department of Biology, Faculty of Sciences, University of Isfahan, Isfahan, Iran

\* Corresponding author: [bordbar@chem.ui.ac.ir](mailto:bordbar@chem.ui.ac.ir)

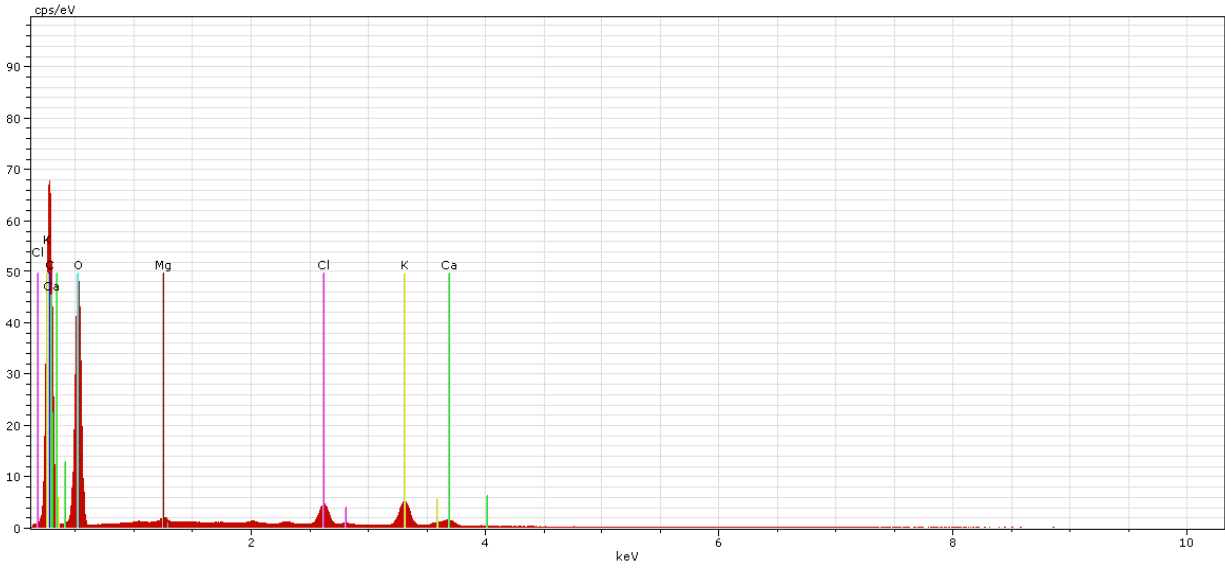

**Figure S1.** EDS spectra of the ethanolic extract of *T. baccata* L.

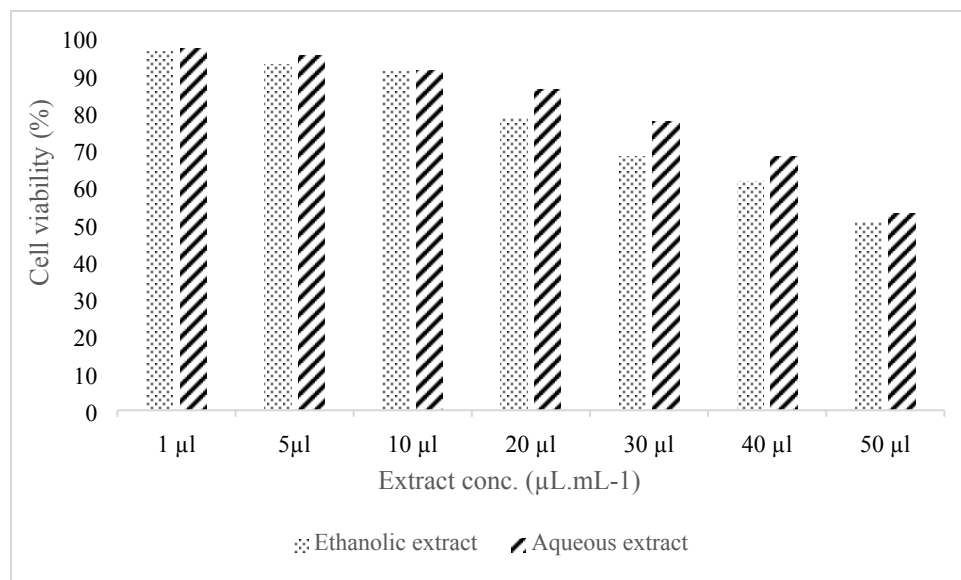

**Figure S2.** Viability percentage of the MCF-7 cells after incubation for 48 hours with different concentrations of the ethanolic and aqueous extracts.
